# Supplementary material for: High-Resolution Bioassay Profiling with Complemented Sensitivity and Resolution for Pancreatic Lipase Inhibitor Screening
Source: MDPI journal article supplement (doi:10.3390/molecules27206923), 2022-10-15
Supplement: s1 [file s1]

# High-Resolution Bioassay Profiling with Complemented Sensitivity and Resolution for Pancreatic Lipase Inhibitor Screening

Jingyi Jian <sup>1,†</sup>, Jiaming Yuan <sup>1,†</sup>, Yu Fan <sup>1,†</sup>, Jincai Wang <sup>1</sup>, Tingting Zhang <sup>1</sup>, Jeroen Kool <sup>2</sup> and Zhengjin Jiang <sup>1,\*</sup>

<sup>1</sup> Institute of Traditional Chinese Medicine & Natural Products, College of Pharmacy/Guangdong Province Key Laboratory of Pharmacodynamic Constituents of TCM and New Drugs Research/International Cooperative Laboratory of Traditional Chinese Medicine Modernization and Innovative Drug Development of Ministry of Education (MOE) of China, Jinan University, Guangzhou 510632, China

<sup>2</sup> Division of BioAnalytical Chemistry, Amsterdam Institute of Molecules, Medicines and Systems, Vrije Universiteit Amsterdam, 1081 HV Amsterdam, The Netherlands

\* Correspondence: jzjjackson@hotmail.com

† These authors contributed equally to this work.

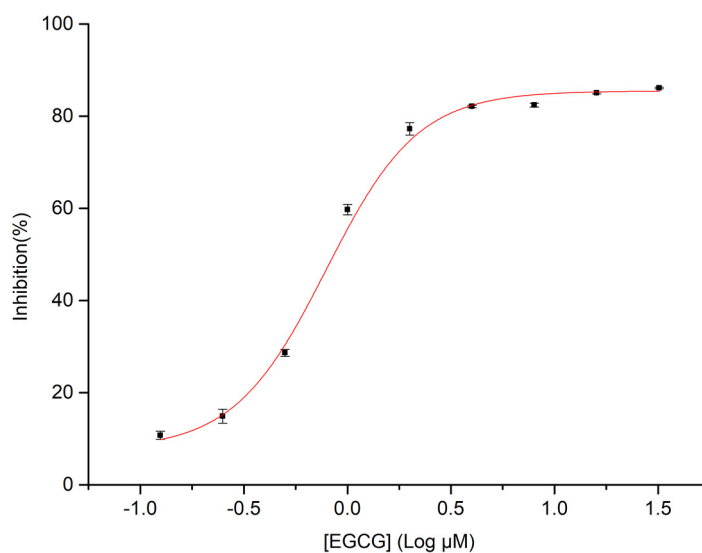

**Figure S1.** Dose-response curve of EGCG ( $\text{IC}_{50}$  of EGCG:  $0.97 \mu\text{M}$ ;  $R^2$ : 0.993).

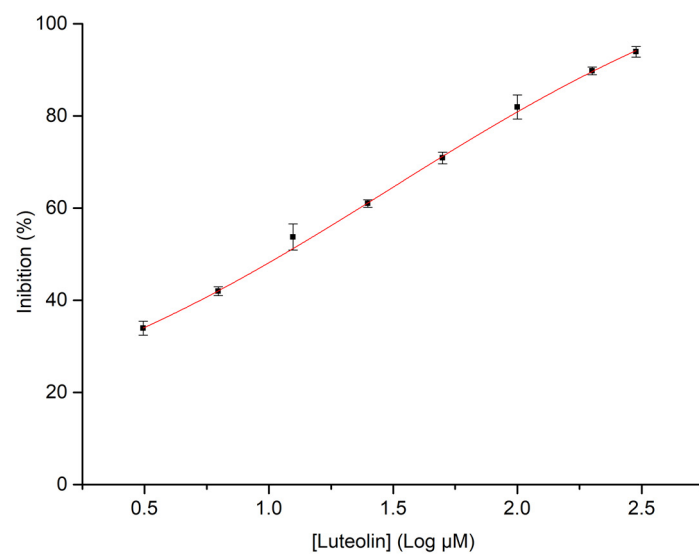

**Figure S2.** Dose-response curve of luteolin ( $\text{IC}_{50}$  of luteolin:  $30.57 \mu\text{M}$ ;  $R^2$ : 0.999).
